# Supplementary material
Source: PubMed Central journal article supplement (PMC5568667)
Supplement: NIHMS697631-supplement-Supplement.pdf [file NIHMS697631-supplement-Supplement.pdf]

1 **SUPPLEMENTARY INFORMATION**

2

3 **SUPPLEMENTARY FIGURES CAPTIONS**

4 **Supplementary Figure 1. Single Unit Waveforms and Inter-Spike Interval (ISI) from microwire arrays**  
5 **and characteristics of recorded ensembles. a,** Left panel shows 100 waveforms of the task related ( $tr_i$   
6 and  $tr_d$ ) and task unrelated ( $tu$ ) units shown in Fig. 1e (conventions are same). Right panel shows ISI  
7 histograms for the corresponding units in the left panel. Scales are same for all waveforms. **b,** Spike-  
8 width calculation for identifying putative interneurons and pyramidal cell types.  $W_1$ ,  $W_2$  and  $W_3$  are  
9 widths of three units between the peaks marked by shaded grey lines. **c,** Histogram showing counts of  
10 spike widths for each of the three category of units (bin size = 10  $\mu$ s). **d,** Spike widths for the three  
11 categories of units (mean  $\pm$  s.e.m.). **e,** Relationship between the  $SWS_{pre}$  and  $SWS_{post}$  firing rates for each  
12 of the three category of units. Also plotted is the linear regression fit for  $tr_d$  units ( $m=0.89$ ;  $R^2=0.89$ ). **f,**  
13 Firing rates of the three categories of units in SWS prior to learning the task. **g,** Firing rates of three  
14 categories of units in SWS after learning.

15

16 **Supplementary Figure 2. Tetraode Recordings. a,** Example of clusters based on amplitude feature from  
17 two channels. **b,** Example of one tetraode with 3 units, each of which had no RPVs (Refractory Period  
18 Violations). Shown are the waveforms, autocorrelation, cross-correlation, and linear discriminant  
19 analysis (LDA). There was no evidence of a relationship in cross-correlations and clear separation of units  
20 according to Fisher's LDA, suggesting over sorting had not occurred. **c,** Respective STA averages from  
21 experiments conducted with either tetraode or microelectrode arrays. The distributions were not  
22 significantly different ( $p=0.9579$ , unpaired t-test).

23

24 **Supplementary Figure 3. Comparison of the modulation depth and post-learning effects for ‘Negative’**  
25 **and ‘Positive’ weight units.** **a**, Comparison of the post-learning firing rates of a single positive-weight  
26 unit ( $tr_d+$ ) and a single negative-weight unit ( $tr_d-$ ). **b**, Average depth of modulation for  $tr_d+$  and  $tr_d-$   
27 units. **c**, Distribution of the modulation depths for all  $tr_d+$  and  $tr_d-$  units (bin size=5%). **d**, Mean STA  
28 amplitude change for the respective population of  $tr_d+$  and  $tr_d-$  units.

29

30 **Supplementary Figure 4. Changes in STA during task performance.** **a**, Top panel compares the STA of a  
31 task related ( $tr_d$ ) unit during early (blue) and late (red) trials during task performance/learning in a single  
32 session. This STA is based on ‘Beta’ band filtered LFP (i.e. 12-40 Hz). In contrast, we did not observe  
33 significant changes in other bands (e.g. SWA band, theta, alpha, higher frequencies) as shown in the  
34 unfiltered STA beneath it. **b**, This shows the population averages of the change in STA amplitude when  
35 comparing early and late trials from robust learning sessions. This indicates a significant drop in locking  
36 of spiking to the Beta band for task related units. Reduced locking of units to this frequency is  
37 consistent with the broader notion of ‘movement-related desynchronization’ that is commonly observed  
38 with movements<sup>1</sup> or neuroprosthetic control<sup>2</sup>. Interestingly,  $tu$  units did not display this relationship. \*  
39 ANOVA test followed by t-test, \*  $p < 0.0001$ .

40

41 **Supplementary Figure 5. Hypnogram.** **a**, Top panel depicts sleep and awake transitions. Bottom panels  
42 show the respective LFP activity/EMG activity. **b**, Comparison of SWS duration for all of the pre- and  
43 post- robust learning sessions (n=15 sessions,  $p=0.98$ , paired t-test).

44

45 **Supplementary Figure 6. Changes in locking to spindle and ripple frequency bands.** **a**, Left panel  
46 shows the STA of a  $tr_d$  unit in the ripple band (100-300Hz) in  $SWS_{pre}$  and  $SWS_{post}$ . Right panel illustrates  
47 the mean change in STA for the three classes of units. **b**, Left panel shows the STAs in the spindle band  
48 (8-20Hz). Right panel shows the mean changes in STAs for the three unit classes.

49

50 **Supplementary Figure 7. Power-spectral density (PSD) of the pre- and post-LFP during slow-wave**  
51 **sleep.** Summary of the changes in the normalized 0.3-3 Hz power for the entire duration of SWS  
52 ( $SWS_{pre}$ :  $2271.42 \pm 80.79$  s and  $SWS_{post}$ :  $2189.75 \pm 39.54$ s and, N= 15 sessions,  $p=0.704$ ).

53

54 **Supplementary Figure 8. Firing characteristics prior to and after learning.** **a**, Interspike-interval  
55 histograms of a task-related unit during  $SWS_{pre}$  and  $SWS_{post}$ . These were based on spiking that occurred  
56 during the SWA negativity. The two distributions are not significantly different from each other (KS test,  
57  $p > 0.05$ ), indicating no significant change in bursting. **b**, Comparison of the ISI distributions for  $SWS_{pre}$   
58 and  $SWS_{post}$ . Each bar shows the percentage of units that did not experience a significant change in the  
59 ISI distribution. **c**, Comparison of the delta wave density in  $SWS_{pre}$  and  $SWS_{post}$  for robust learning  
60 sessions (n=15 sessions,  $p=0.16$ ).

61

62 **Supplementary Figure 9. ON/OFF periods across LFP channels.** **a**, Grid shows task related and unrelated  
63 units at various sites on the microwire probe. Segments of the  $SWS_{post}$  LFP are shown for a variety of  
64 electrode recording sites. **b**, Bar plot showing temporal lags (i.e. temporal delay in milliseconds)  
65 between OFF periods for channels with  $tr_d$  and 'distant'  $tu$  units (i.e. at least two channels away from a  
66  $tr_d$ ). **c**, Bar plot showing density of OFF periods in the channels with  $tr_d$  and distant  $tu$  units.

67

68 **Supplementary Figure 10. Spike-field coherence (SFC) magnitude and phase after learning.** **a**, Plot of  
69 the full SFC spectrum as a function of frequency before (blue) and after (red) skill acquisition for a  $tr_d$   
70 and  $tu$  unit (0-20Hz band is shown in Fig 3). **b**, Distribution of phases of  $tr_d$ ,  $tr_i$  and  $tu$  units are shown in  
71 pre and post-SWS in a polar plot. Mean phase of  $tr_d$  units is shown in bold blue (before) and red (after)  
72 vector. The phases were uniformly distributed and didn't change significantly for each of the  
73 comparisons for the three classes of units between  $SWS_{pre}$  and  $SWS_{post}$ .

74

75 **Supplementary Figure 11. Averaged cross-correlation histograms (CCH).** The mean of the peak-to-tail  
76 ratio for each of the three categories ( $tr_d-tr_d$ ,  $tr_d-tr_i$  and  $tr_d-tu$  neuronal pairs) in their CCHs. \*ANOVA,  
77 followed by t-test  $p < 0.0001$ .

78

79 **Supplementary Figure 12. Changes in reactivation strength during awake versus SWS.** **a**,  
80 Reactivation strength of the signal component during  $SWS_{pre}$ ,  $Awake_{post}$  (shown in gray in right panel)  
81 and  $SWS_{post}$ . **b**, Mean population difference histograms of pre- and post- reactivation strengths for the  
82 awake and SWS period. In each case the respective histogram of  $SWS_{pre}$  was subtracted from the  
83 respective awake and  $SWS_{post}$  periods. Also shown is the mean population difference curve for poor  
84 learning sessions. \*  $p < 0.05$ , Logrank test showed significantly greater reactivation during post sleep. **c**,  
85 Event triggered average of reactivation strength centered on the maximum delta wave negativity for  
86  $SWS_{post}$  (red) and awake (purple) sessions. **d**, Comparison of the change in event triggered negativity for  
87 the  $awake_{post}$  and  $SWS_{post}$  time periods. The relative reactivation compares the baseline (time less than  
88 0) to the peak \*  $p < 0.01$  t-test.

89

90 **Supplementary Figure 13. Task Improvements after sleep.** Average time to reward for the 30 best  
91 trials during the first BMI training session (i.e. Block<sub>1best</sub>) compared to the beginning of second session  
92 (Block<sub>2begin</sub>). \*  $p < 0.05$  paired t-test.

93

94

95

96 **SUPPLEMENTARY TABLE CAPTIONS**

97 **Table 1.** Details of fifteen robust learning sessions. The ‘\*’ denotes sessions which were followed by a  
98 second learning session (i.e. Figure 6).

99    **REFERENCES**

- 100    1.    Murthy, V.N. & Fetz, E.E. Coherent 25- to 35-Hz oscillations in the sensorimotor cortex of awake  
101        behaving monkeys. *Proc Natl Acad Sci U S A* **89**, 5670-4 (1992).
- 102    2.    McFarland, D.J., Krusienski, D.J. & Wolpaw, J.R. Brain-computer interface signal processing at  
103        the Wadsworth Center: mu and sensorimotor beta rhythms. *Prog Brain Res* **159**, 411-9 (2006).

# Supplementary Figure 1

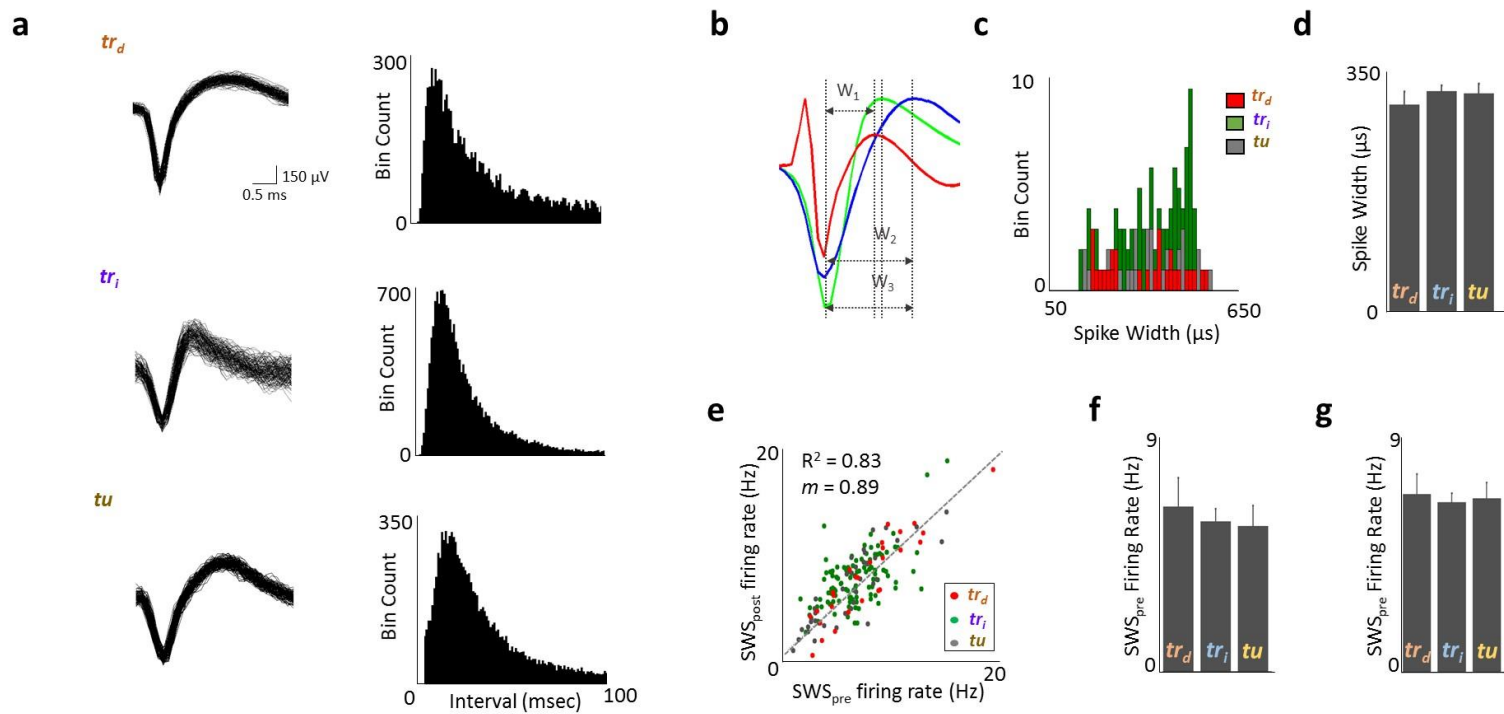



# Supplementary Figure 2

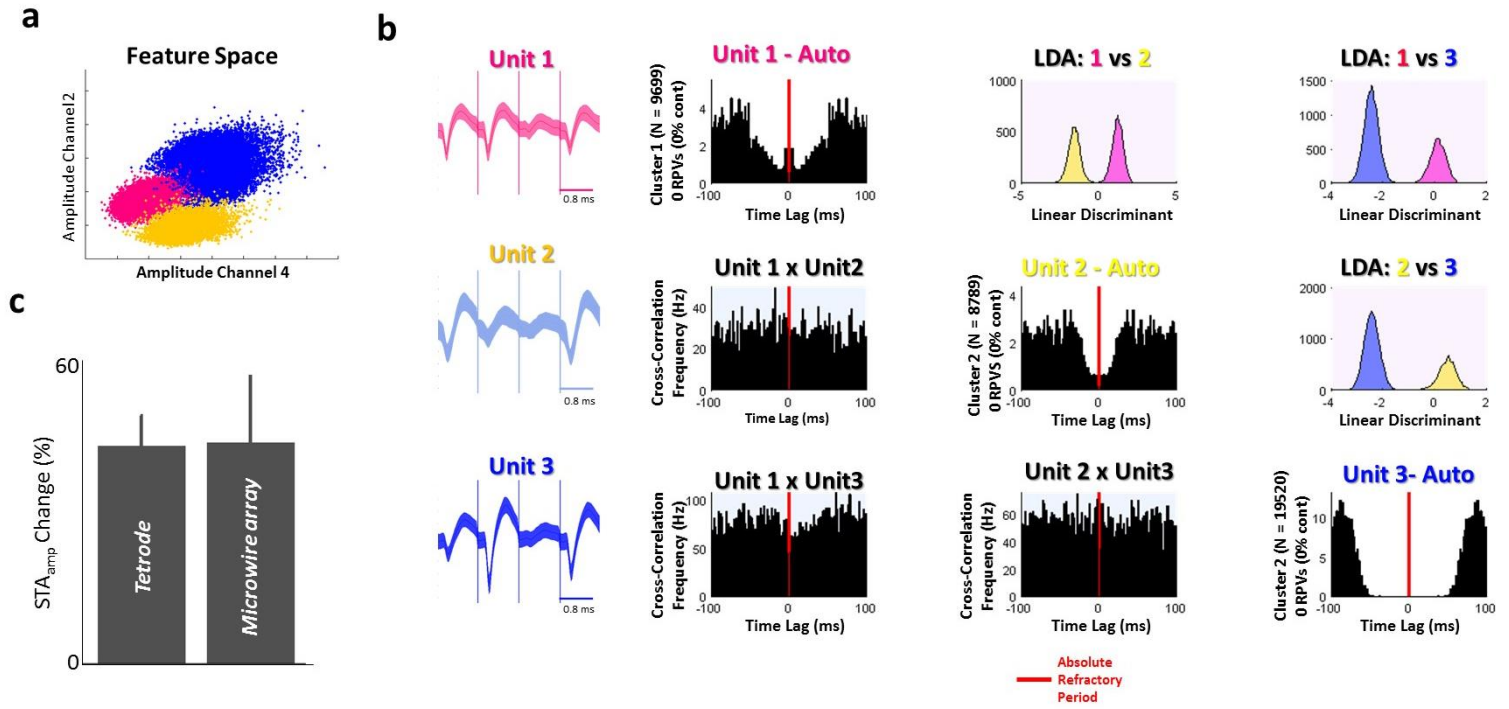

# Supplementary Figure 3

**a**

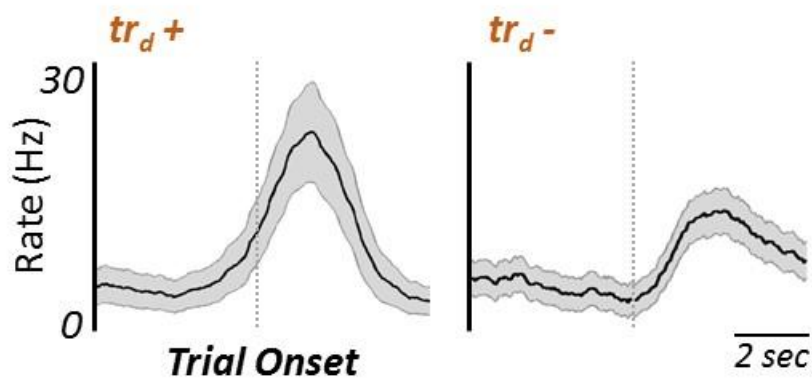

**b**

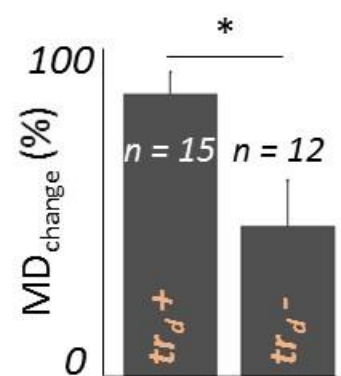

**c**

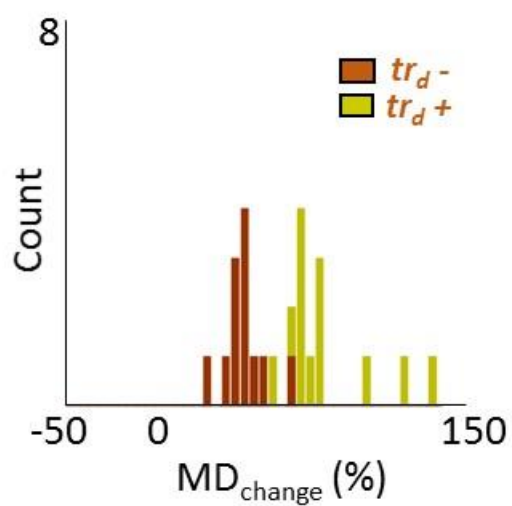

**d**

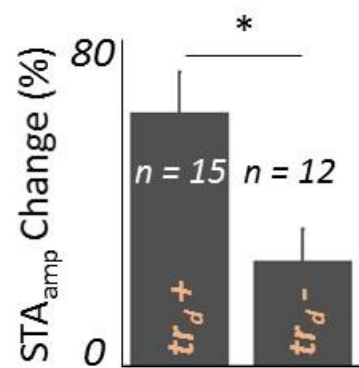

# Supplementary Figure 4

**a**

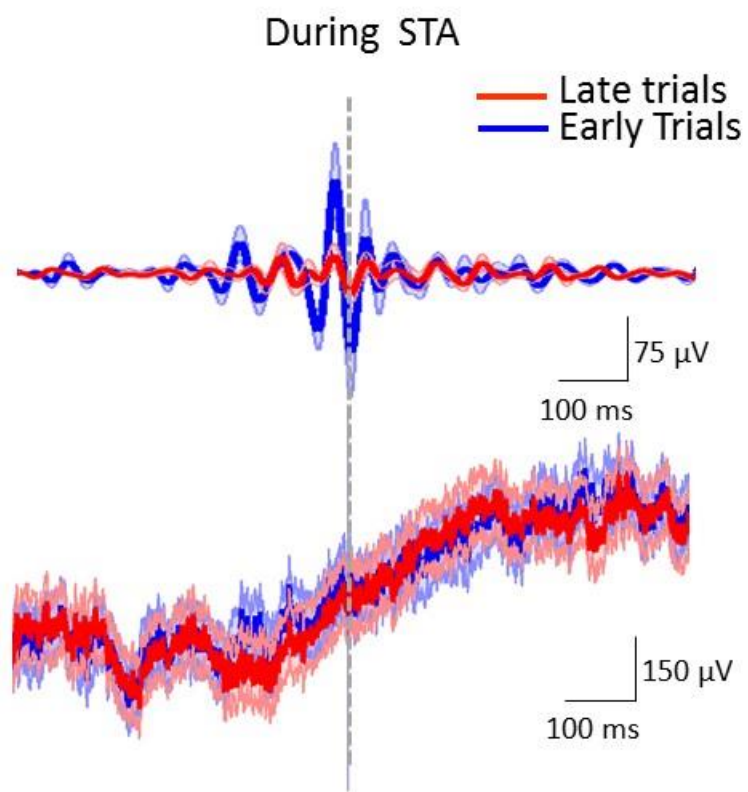

**b**

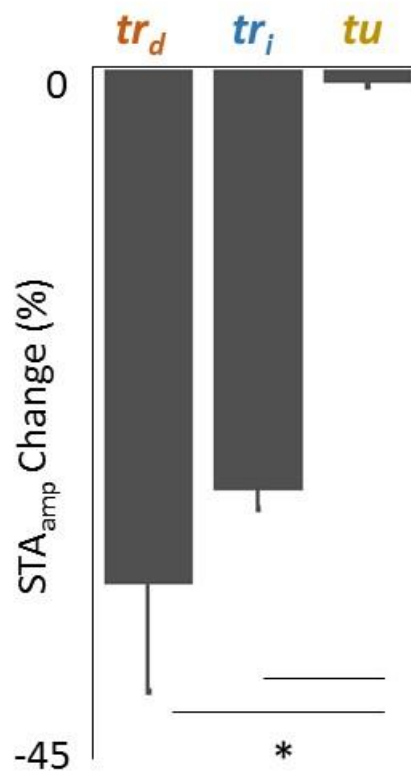

# Supplementary Figure 5

**a**

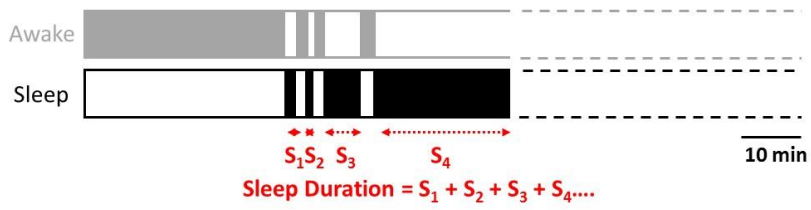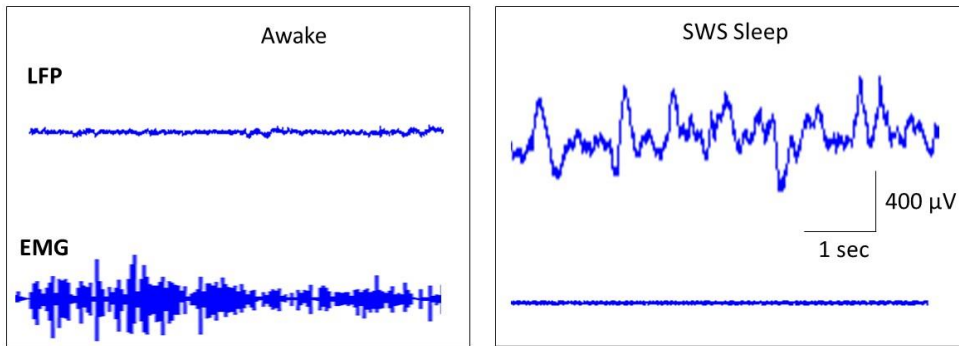

**b**

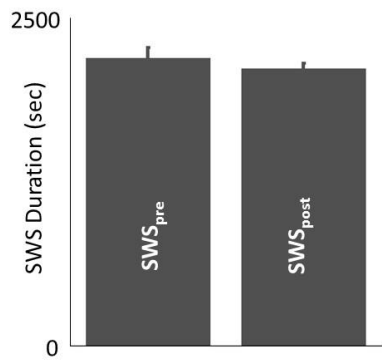

# Supplementary Figure 6

**a**

## Ripple-band (8 - 20 Hz) STA

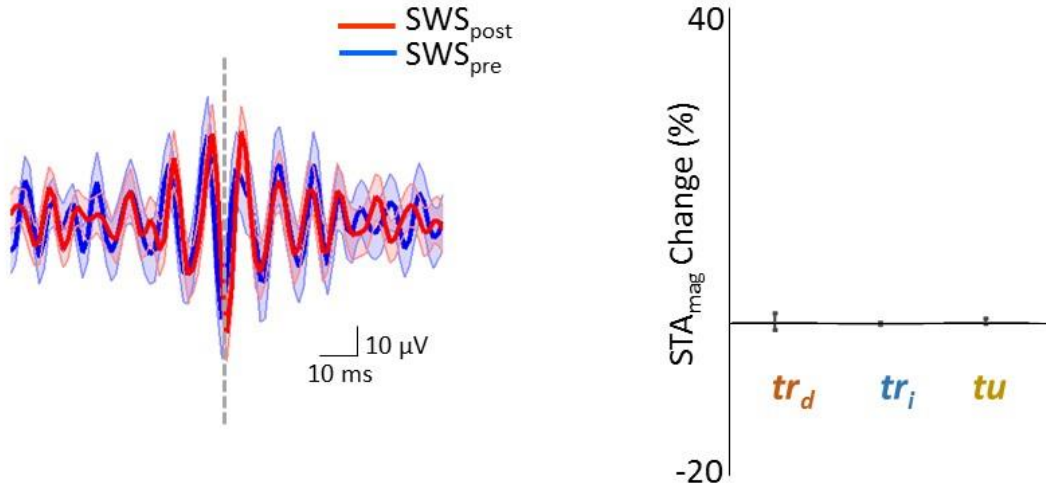

**b**

## Spindle-band (100 - 300Hz) STA

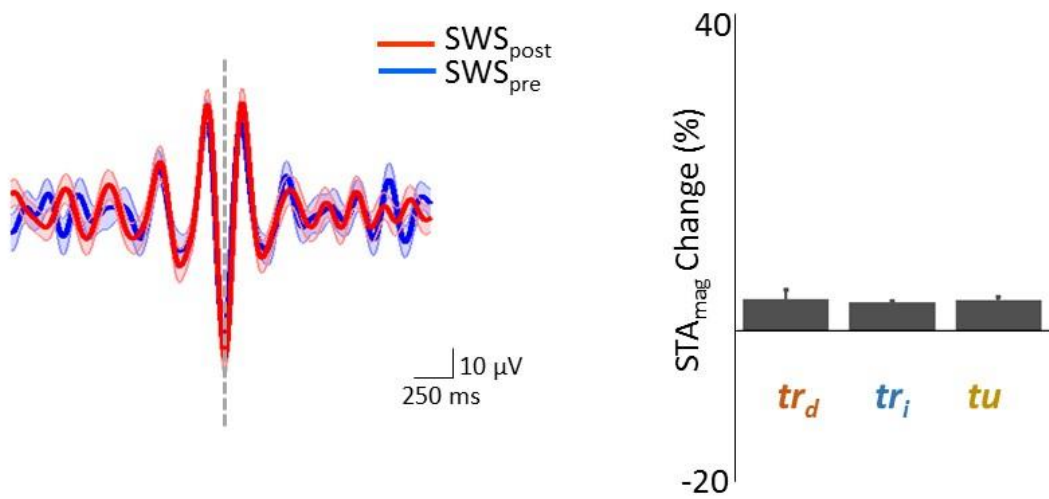

# Supplementary Figure 7

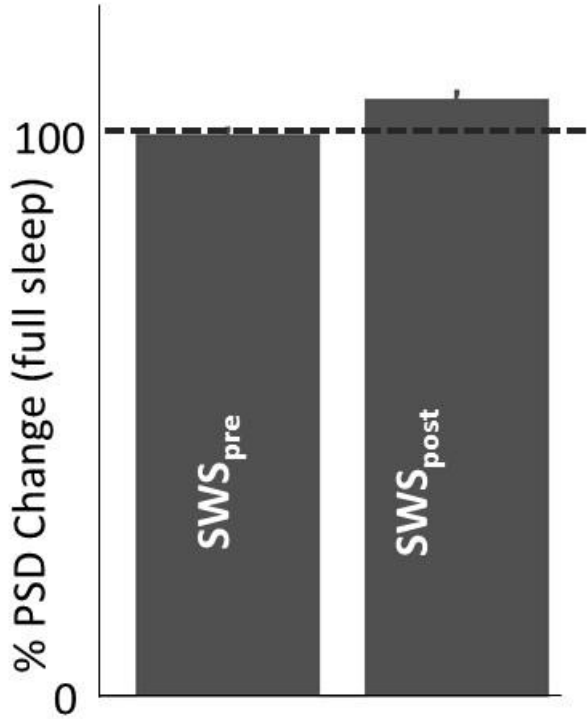

# Supplementary Figure 8

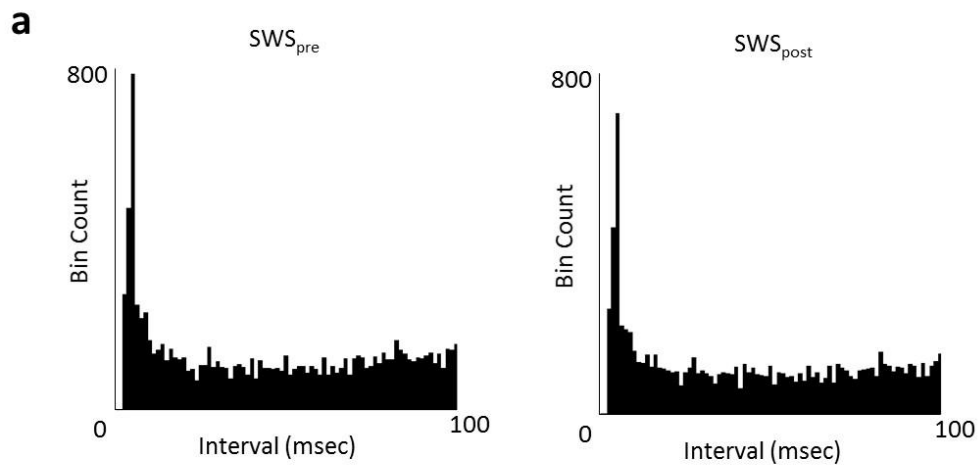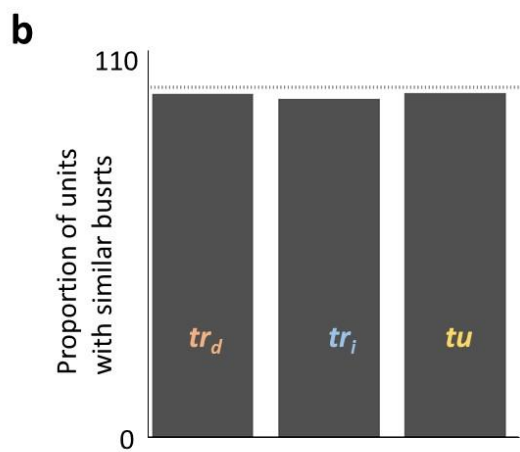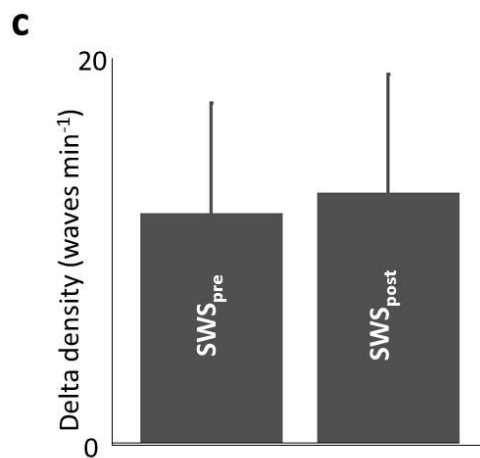

# Supplementary Figure 9

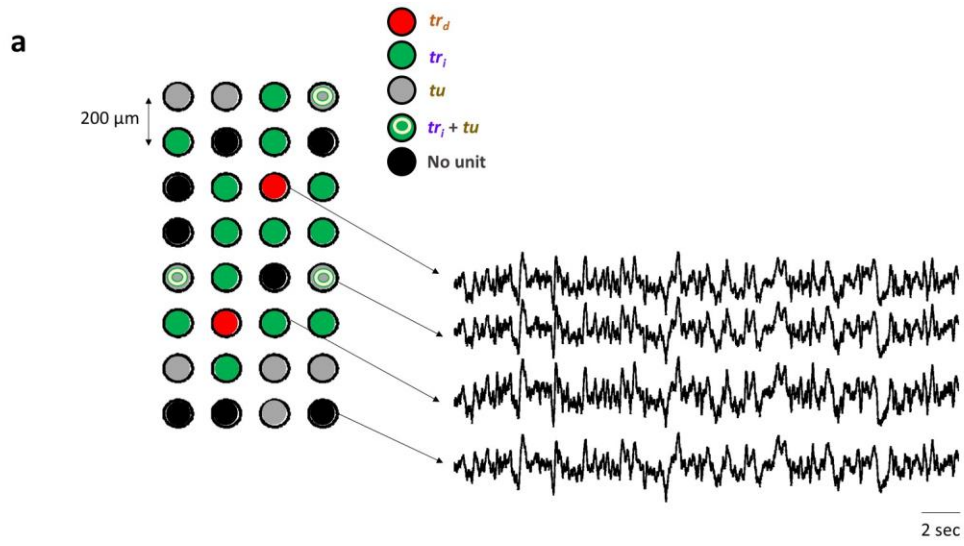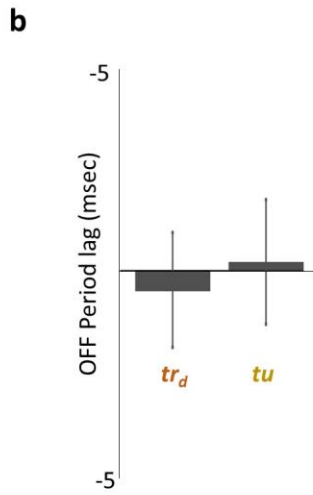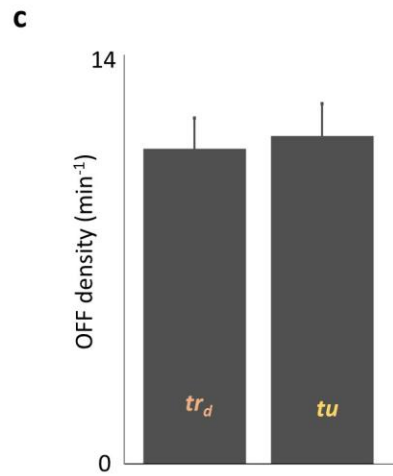



# Supplementary Figure 10

**a**

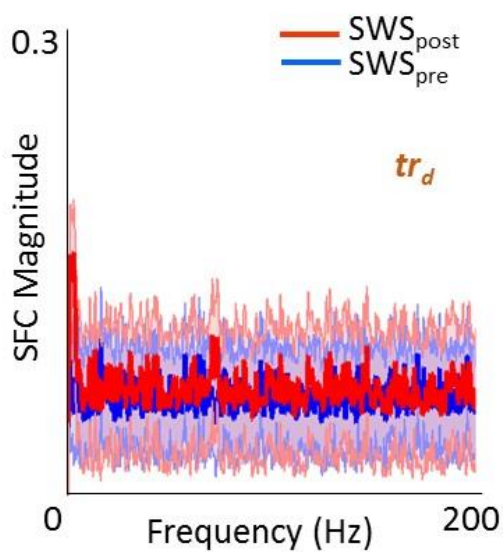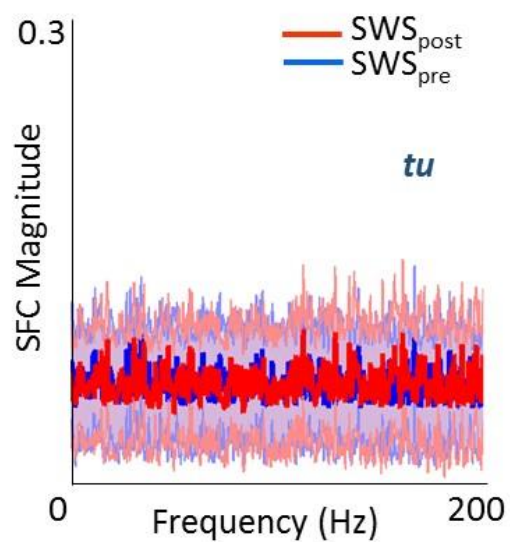

**b**

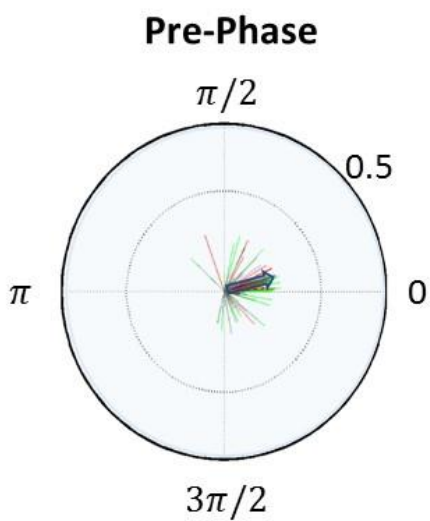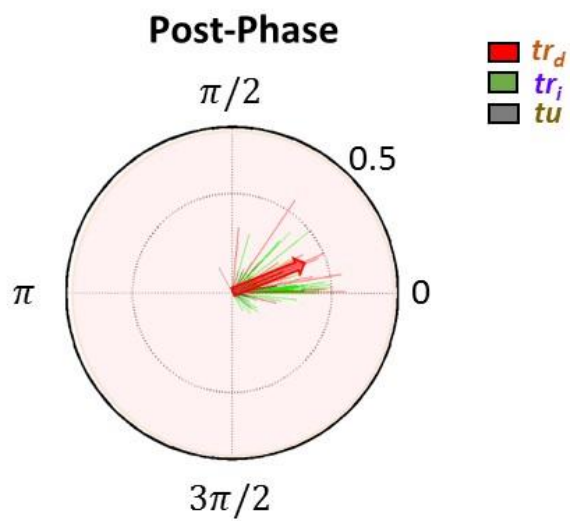

# Supplementary Figure 11

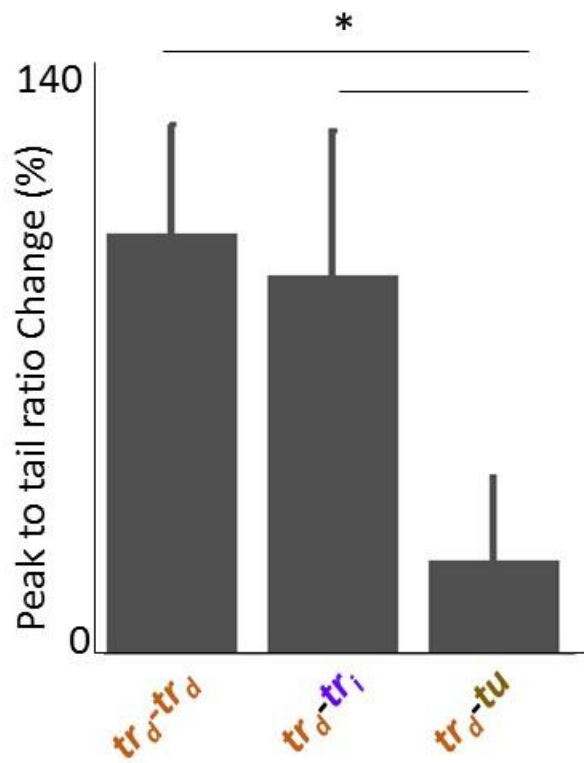

# Supplementary Figure 12

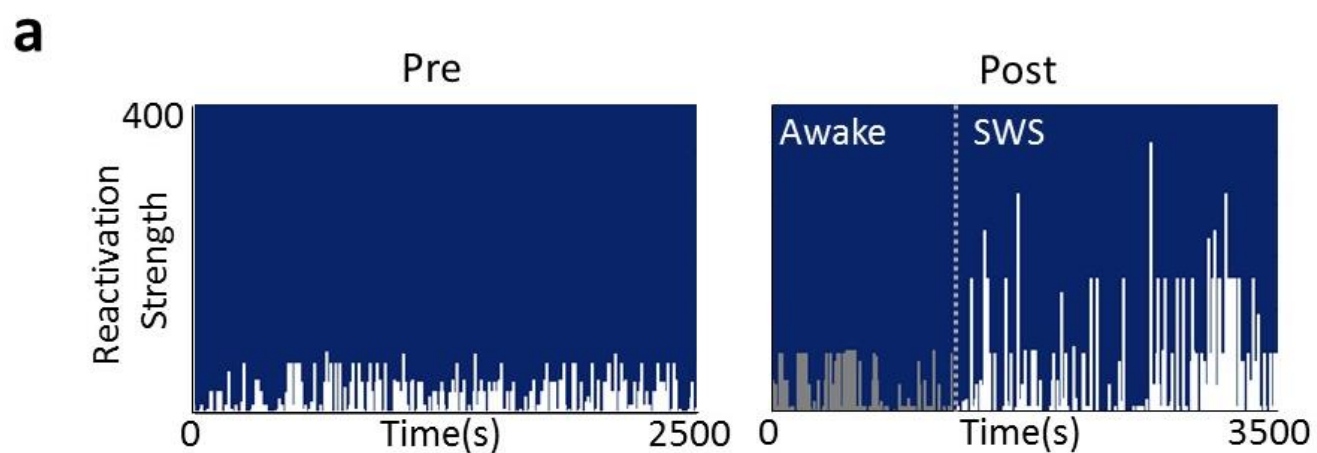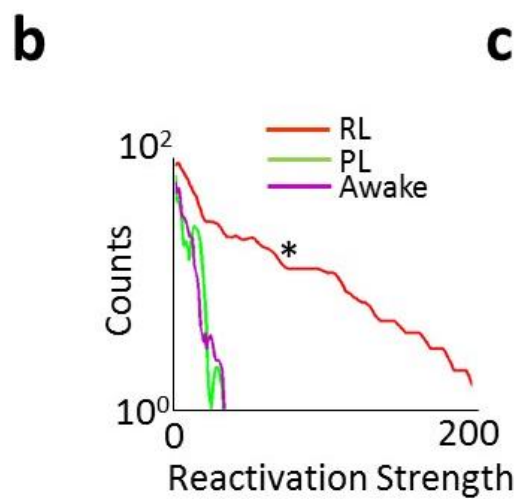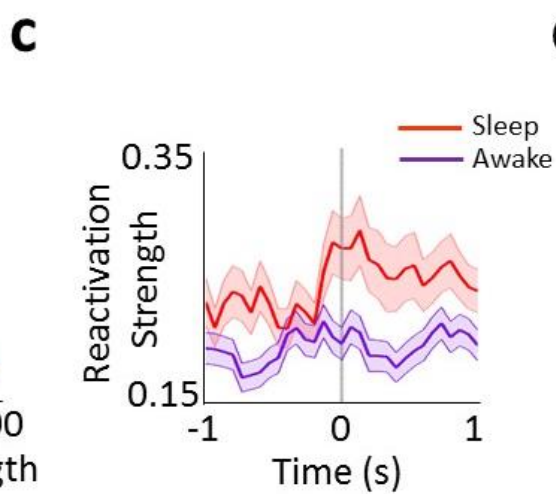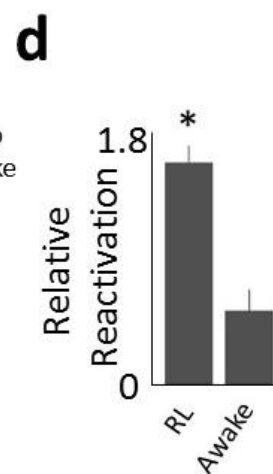

# Supplementary Figure 13

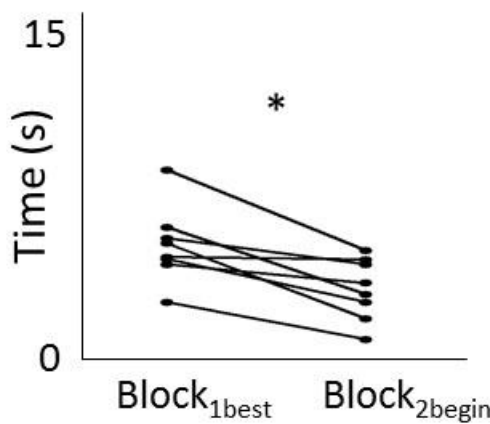

# Table 1

Table 1: Table of Units in each session

| <b>Session (#)</b> | <b>Rat</b> | <b>Neural Probe</b> | <b>Total no. of cells</b> | <b><math>tr_d</math></b> | <b><math>tr_i</math></b> | <b><math>tu</math></b> |
|--------------------|------------|---------------------|---------------------------|--------------------------|--------------------------|------------------------|
| 1                  | Rat 1      | MEA                 | 21                        | 2                        | 15                       | 4                      |
| 2                  | Rat 1*     | MEA                 | 11                        | 2                        | 3                        | 6                      |
| 3                  | Rat 2*     | MEA                 | 14                        | 2                        | 10                       | 2                      |
| 4                  | Rat 2      | MEA                 | 24                        | 2                        | 16                       | 6                      |
| 5                  | Rat 2*     | MEA                 | 16                        | 1                        | 10                       | 5                      |
| 6                  | Rat 3*     | MEA                 | 10                        | 2                        | 6                        | 2                      |
| 7                  | Rat 3      | MEA                 | 16                        | 1                        | 9                        | 6                      |
| 8                  | Rat 4*     | Silicon Probe       | 6                         | 2                        | 2                        | 2                      |
| 9                  | Rat 4      | Silicon Probe       | 6                         | 2                        | 3                        | 1                      |
| 10                 | Rat 5*     | MEA                 | 10                        | 2                        | 5                        | 3                      |
| 11                 | Rat 5*     | MEA                 | 10                        | 2                        | 7                        | 1                      |
| 12                 | Rat 6*     | Silicon Probe       | 7                         | 2                        | 4                        | 1                      |
| 13                 | Rat 6      | Silicon Probe       | 7                         | 2                        | 5                        | 0                      |
| 14                 | Rat 6      | Silicon Probe       | 8                         | 1                        | 7                        | 0                      |
| 15                 | Rat 6      | Silicon Probe       | 8                         | 2                        | 6                        | 0                      |
